# Supplementary material for: Particle association and size fraction of molecular viral fecal pollution indicators in wastewater
Source: Royal Society of Chemistry journal article supplement (doi:10.1039/d2ew00126h), 2022-01-01
Supplement: d2ew00126h1.pdf [file d2ew00126h1.pdf]

# **Supporting Information: Particle association and size fraction of molecular viral fecal pollution indicators in wastewater**

Justin Greaves<sup>a,b</sup>, Devin North<sup>b</sup>, Kyle Bibby<sup>b\*</sup>

<sup>b</sup>School of Environmental Sustainability, Loyola University Chicago, 6364 N. Sheridan Rd,  
Chicago, IL 60660

<sup>a</sup>Department of Civil and Environmental Engineering and Earth Sciences, University of Notre  
Dame, IN 46556, USA

\*Corresponding author [KBibby@ND.edu](mailto:KBibby@ND.edu); 574-631-1130

## **Keywords**

Microbial source tracking, Transport, Water quality, PMMoV, crAssphage

## 24 **Methods:**

### 25 Sampling methods

26 Wastewater samples from this study were taken from an anonymous conventional  
27 activated sludge wastewater treatment plant that served a population of approximately  
28 50,000 people. Primary influent samples were taken from one of the four clarifiers  
29 present at the plant (Greaves et al., 2020).

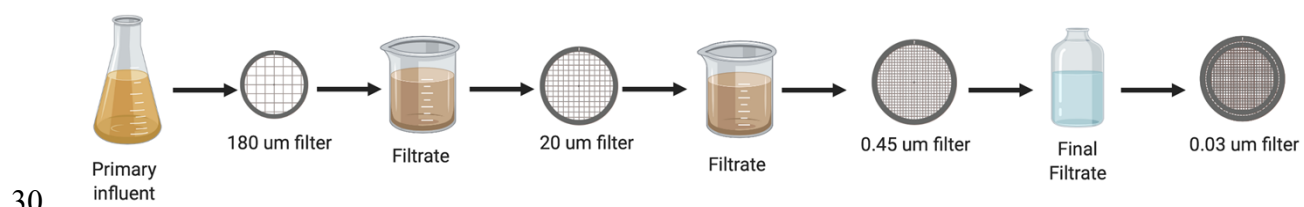

31 **Figure S1:** Schematic of procedure used throughout experiment.

### 33 Molecular methods

34 Thermocycler conditions for each assay are described in **Table S1**. Values were  
35 generated by allowing program to automatically set threshold. Detection limit for  
36 molecular assays was assumed to be  $1.70 \log_{10}$  GC/100mL (Wu et al., 2020).

## 38 **Results:**

### 39 Size distribution results

40 PMMoV had its highest mean concentration on the 0.45  $\mu\text{m}$  filter (40.0%). The second  
41 highest, third highest and lowest concentration of PMMoV was on the 20 (36.7%), 180  
42 (14.2%), 0.03 (11.2%)  $\mu\text{m}$  filters, respectively. NoV GII had its highest mean  
43 concentration on the 0.45  $\mu\text{m}$  filter (58.8%). The second highest, third highest and  
44 lowest concentration of NoV GII was on the 20 (20.9%), 180 (11.4%), 0.03 (8.9%)  $\mu\text{m}$

45 filters, respectively. AdV had its highest mean concentration on the 0.45 µm filter  
 46 (46.6%). The second highest, third highest and lowest concentration of AdV was on the  
 47 20 (39.4%), 180 (10.0%), 0.03 (3.9%) µm filters, respectively. HPyV had its highest  
 48 mean concentration on the 0.45 µm filter (55.5%). The second highest, third highest and  
 49 lowest concentration of HPyV was on the 20 (23.6%), 0.03 (11.9%), 180 (9.0%) µm  
 50 filters, respectively. CrAssphage had its highest mean concentration on the 0.45 µm  
 51 filter (55.2%). The second highest, third highest and lowest concentration of crAssphage  
 52 was on the 20 (24.6%), 180 (17.7%), 0.03 (2.4%) µm filters, respectively. HF183 had its  
 53 highest mean concentration on the 0.45 µm filter (80.5%). The second highest, third  
 54 highest and lowest concentration of HF183 was on the 180 (15.9%), 20 (3.5%), 0.03  
 55 (0.04%) µm filters, respectively.

56

#### 57 Settling velocity method calculations

58 To put our data in context, settling velocities for each particles size (180, 20, 0.45 and  
 59 0.03 µm) were calculated using stokes equation below:

$$60 \quad v_t = \frac{gd^2(\rho_p - \rho_m)}{18u} \quad (1)$$

61 Where g is the acceleration of gravity (9.81 m/s<sup>2</sup>), d is the diameter of the particle,  $\rho_p$  is  
 62 the density of the particle (assumed to be 1,038 kg/m<sup>3</sup>),  $\rho_m$  is the density of the matrix  
 63 (assumed to be 1,000 kg/m<sup>3</sup>) and u is the matrix viscosity (assumed to be 0.001 kg/ms).  
 64 The settling velocity of the smallest sized particles (assumed d=180 µm) captured on  
 65 the 180 µm filter is 4.03 cm/min and hence represents particles that will settle over a  
 66 residence time in wastewater treatment plants or in surface water. Settling velocity for

particles captured on the 0.45 (assumed  $d=0.45\ \mu\text{m}$ ) and  $20\ \mu\text{m}$  (assumed  $d=20\ \mu\text{m}$ ) filters is  $3.5\times 10^{-5}$  and  $0.05\ \text{cm/min}$ , respectively, and represent particles that may settle depending on the residence time and mixture within the system. The settling velocity of particles trapped on the  $0.03\ \mu\text{m}$  (assumed  $d=0.03\ \mu\text{m}$ ) filter is  $1.1\times 10^{-7}\ \text{cm/min}$  and represent non-settling particles in all waters.

**Table S1:** Primers, probes, and cycling conditions for all molecular assays used in this study

| Marker     | Primers/Probes                                           | Cycling condition                                                                           | Source                                      |
|------------|----------------------------------------------------------|---------------------------------------------------------------------------------------------|---------------------------------------------|
| HF183      | Forward - ATCATGAGTTCACATGTCCG                           | 10 mins at 95 C, 40 cycles of 95C for 30s and 60C for 60 s, 10 mins at 98C                  | Green et al., 2014                          |
|            | Reverse - CTTCTCTCAGAACCCCTATCC                          |                                                                                             |                                             |
|            | Probe FAM-CTAATGGAACGCATCCC-BHQ-1                        |                                                                                             |                                             |
| AdV        | Forward - GCC ACG GTG GGG TTT CTA AAC TT                 | 10 mins at 95 C, 40 cycles of 95C for 30s and 58C for 60 s, 10 mins at 98C                  | Heim et al., 2003                           |
|            | Reverse - GCC CCA GTG GTC TTA CAT GCA CAT C              |                                                                                             |                                             |
|            | Probe - FAM-TGC ACC AGA CCC GGG CTC AGG TAC TCC GA-BHQ-1 |                                                                                             |                                             |
| HPyV       | Forward - AGT CTT TAG GGT CTT CTA CCT TT                 | 10 mins at 95 C, 40 cycles of 95C for 30s and 58C for 60 s, 10 mins at 98C                  | McQuaig et al., 2009                        |
|            | Reverse - GGT GCC AAC CTATGGAACAG                        |                                                                                             |                                             |
|            | Probe - FAM-TCATCACTGGCAAACAT-BHQ-1                      |                                                                                             |                                             |
| crAssphage | Forward - CAG AAG TAC AAA CTC CTA AAA AAC GTA GAG        | 10 mins at 95 C, 40 cycles of 95C for 30s and 60C for 60 s, 10 mins at 98C                  | Stachler et al. 2018                        |
|            | Reverse - GAT GAC CAA TAA ACA AGC CAT TAG C              |                                                                                             |                                             |
|            | Probe - FAM- AAT AAC GAT TTA CGT GAT GTA AC-BHQ-1        |                                                                                             |                                             |
| PMMoV      | PMMV-FP1-rev - GAGTGGTTTGACCTTAACGTTTGA                  | 60 mins at 49 C, 10 mins at 95 C, 40 cycles of 95C for 30s and 60C for 60 s, 10 mins at 98C | Haramoto et al 2013                         |
|            | PMMV-RP1 - TTGTCGGTTGCAATGCAAGT                          |                                                                                             |                                             |
|            | PMMV-Probe1 - FAM-CCTACCGAAGCAAATG-MGB-NFQ               |                                                                                             |                                             |
| NoV GII    | Forward - ATG TTC AGR TGG ATG AGR TTC TCW GA             | 60 mins at 49 C, 10 mins at 95 C, 40 cycles of 95C for 30s and 60C for 60 s, 10 mins at 98C | Loisy et al., 2005<br>Kageyama et al., 2003 |
|            | Reverse - TCG ACG CCA TCT TCA TTC ACA                    |                                                                                             |                                             |
|            | Probe - FAM - AGC ACG TGG GAG G GC GAT CG - BHQ1         |                                                                                             |                                             |



**Table S2:** ddPCR summary Statistics of performance metrics

| Target     | Poisson Mean estimate |        |       |       | Number of Accepted droplets |        |       |       | Fluorescence amplitude difference<br>between positive and negative<br>droplets |        |       |       |
|------------|-----------------------|--------|-------|-------|-----------------------------|--------|-------|-------|--------------------------------------------------------------------------------|--------|-------|-------|
|            | min                   | median | mean  | max   | min                         | median | mean  | max   | min                                                                            | median | mean  | max   |
| crAssphage | 0.000                 | 0.282  | 0.288 | 0.986 | 4854                        | 13441  | 12937 | 18257 | 430                                                                            | 2108   | 1752  | 2458  |
| HF183      | 0.000                 | 0.060  | 0.203 | 0.993 | 4854                        | 13507  | 12936 | 16250 | 819                                                                            | 13507  | 12936 | 16250 |
| AdV        | 0.000                 | 0.006  | 0.025 | 0.180 | 10618                       | 12038  | 12169 | 14548 | 253                                                                            | 3023   | 2625  | 3547  |
| HPyV       | 0.000                 | 0.002  | 0.006 | 0.049 | 10618                       | 12079  | 12283 | 15563 | 592                                                                            | 2316   | 2215  | 3544  |
| norovirus  | 0.000                 | 0.002  | 0.005 | 0.048 | 10426                       | 13896  | 13858 | 17006 | 1338                                                                           | 4233   | 3730  | 6041  |
| PMMoV      | 0.000                 | 0.051  | 0.205 | 0.761 | 10760                       | 13112  | 13432 | 16465 | 3089                                                                           | 6304   | 6509  | 7501  |

79 Physical characteristics

80           Sample conductivity and pH averaged 1.25 mS/cm and 7.71, respectively, for all  
81 samples throughout experiment. Air temperature ranged from 29°C in September to  
82 3.9°C in December. Water temperature ranged from 12.1°C in the winter to 23.6°C in  
83 the summer. Average total suspended solids concentration was 106 ( $\pm 10.4$ ) mg/L.

84
